# Supplementary material for: In-situ cloud ground based measurements in Finnish sub-Arctic: Intercomparison of three cloud spectrometers
Source: Copernicus journal article supplement (doi:10.5194/amt-2020-3), 2020-02-20
Supplement: Supplementary file 1 [file amt-2020-3-supplement.pdf]

Supplement of

**In-situ cloud ground based measurements in Finnish sub-Arctic:  
Intercomparison of three cloud spectrometers.**

5     Konstantinos-Matthaios Doulgeris et al.

Correspondence to: Konstantinos M. Doulgeris ([konstantinos.doulgeris@fmi.fi](mailto:konstantinos.doulgeris@fmi.fi))

10     CAPS

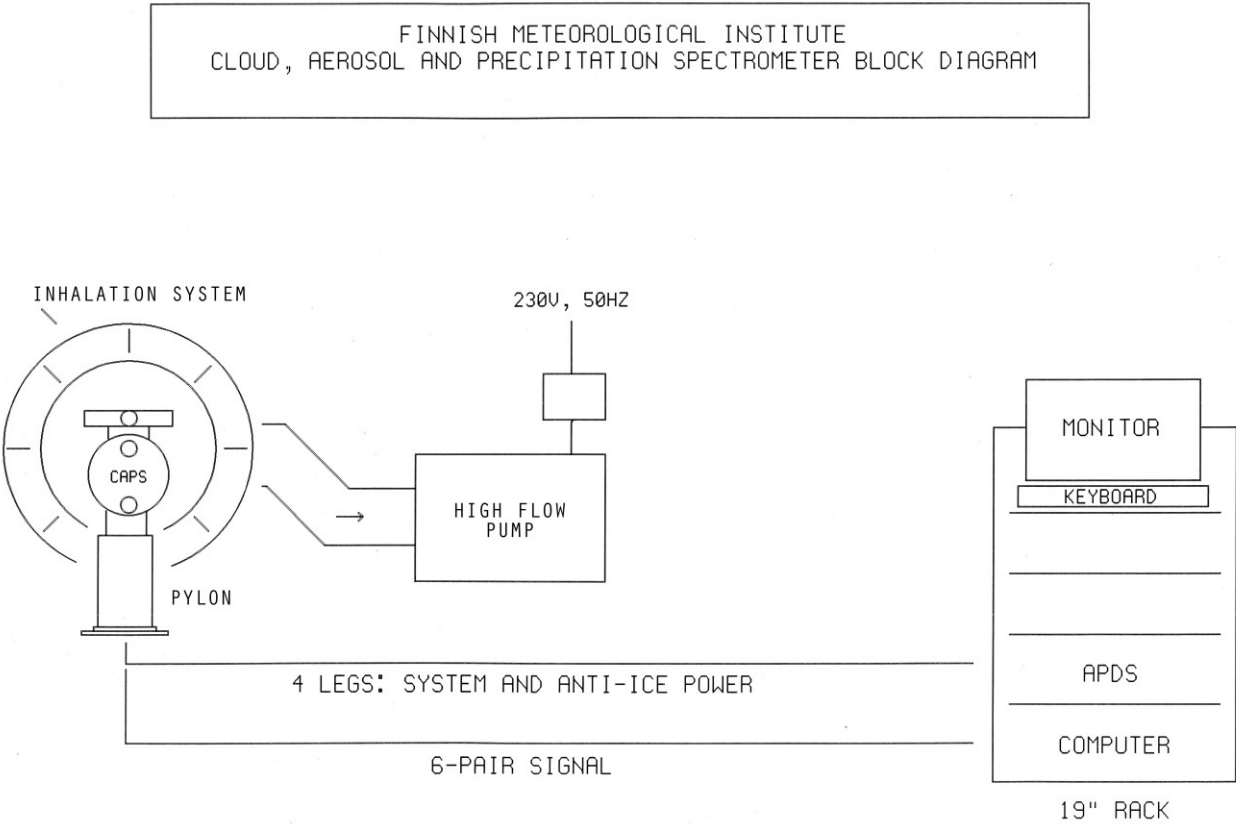

15     **FIGS1: CAPS ground setup schematic figure.**

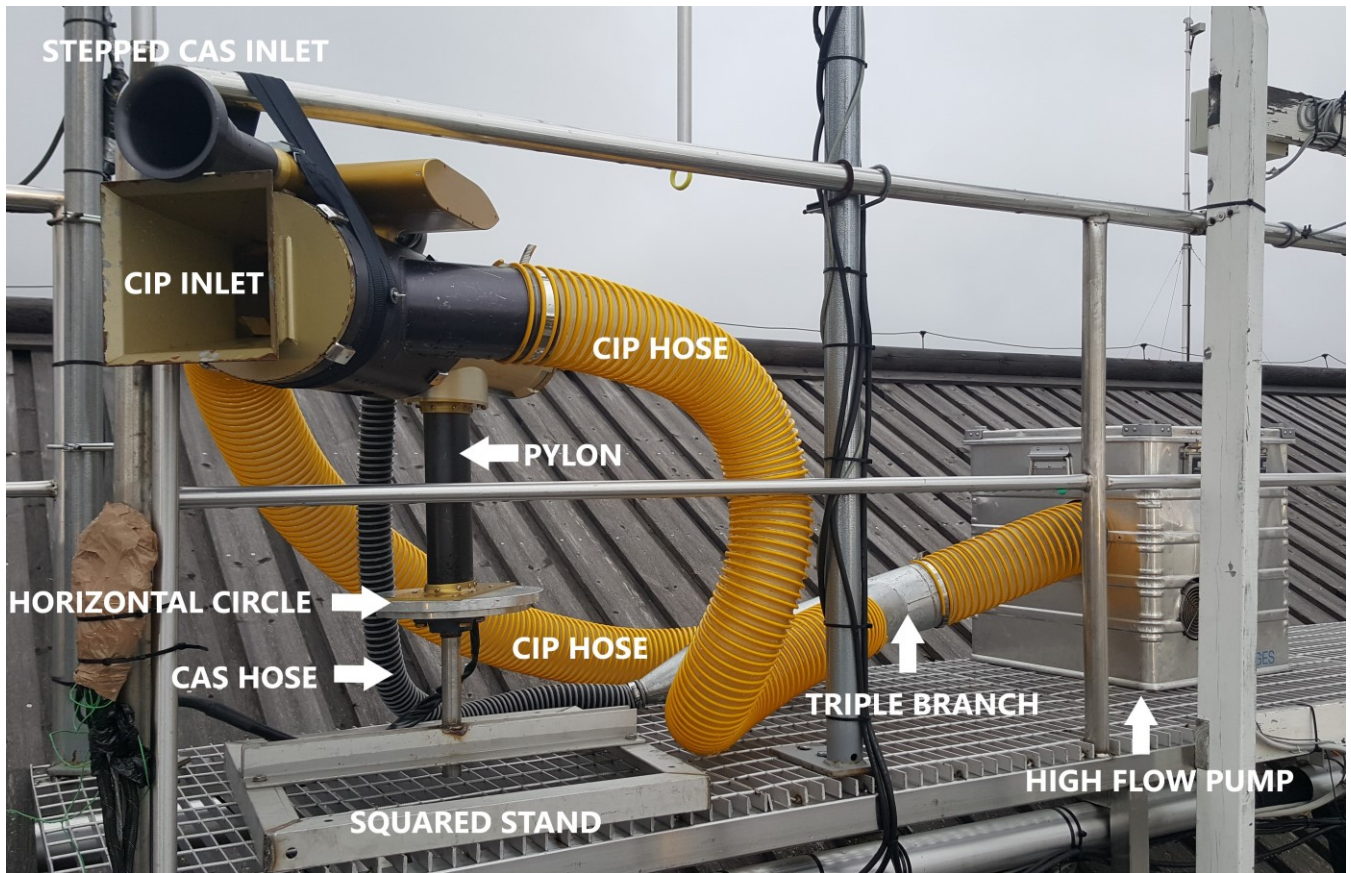

**FIGS2: CAPS ground setup as installed on Sammaltunturi station.**

5

10

15

20

**FSSP**

**5    The FSSP inhalation system**

The FSSP inhalation system was used to enable the operation of the FSSP-100 in a static ground environment. Its design allow it to operate under typical weather research environment conditions. It consisted of a sample tube accelerator, a 400 Hz fan motor and a 400 Hz inverter within an all-weather housing assembly. The sample tube accelerator was inserted in the sample tube from its forward end so that the end of the accelerator was flushed with the base of the sample tube. The all-weather housing assembly fitted between the FSSP optics tubes and against the center sample tube base.

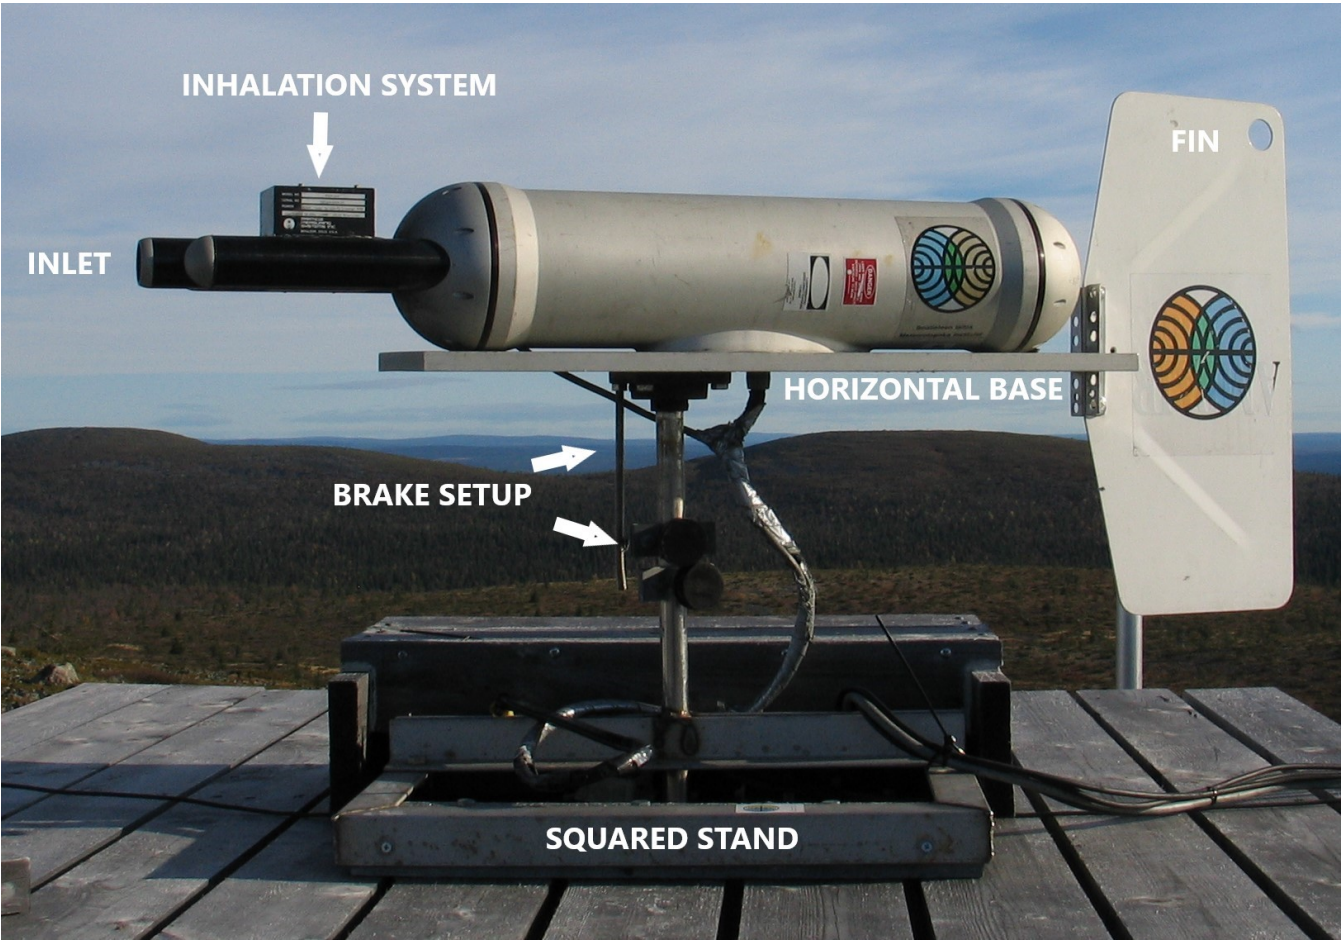

**15    FIGS3: FSSP ground setup as installed on Sammaltunturi station.**



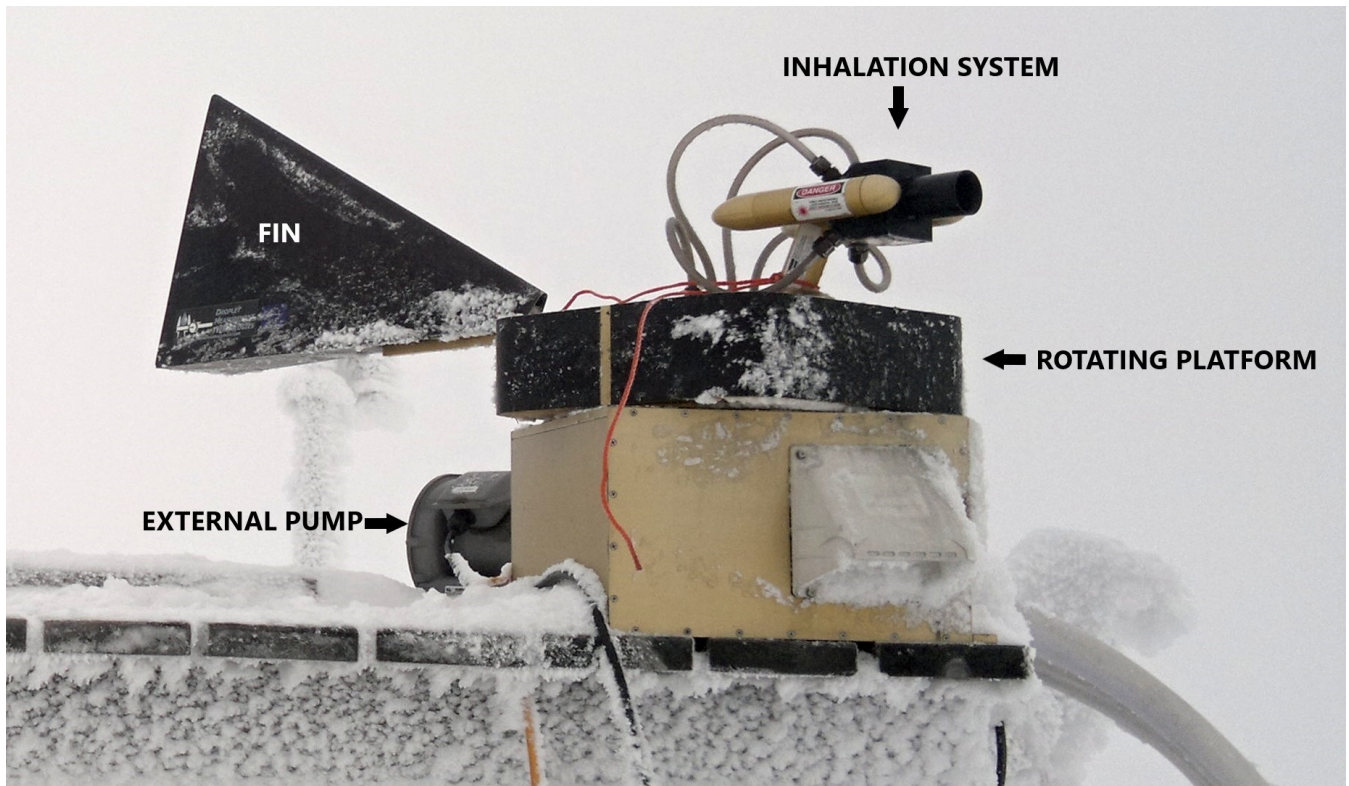

5 FIGS4: CDP ground setup as installed on Sammaltunturi station.
